# Supplementary material for: Development of Novel Microsatellite Markers for the BBCC Oryza Genome (Poaceae) Using High-Throughput Sequencing Technology
Source: PLoS One. 2014 Mar 14;9(3):e91826. doi: 10.1371/journal.pone.0091826 (PMC3954799; doi:10.1371/journal.pone.0091826)
Supplement: Table S1 — Oryza species and accessions used in this study. (XLS) [file pone.0091826.s001.xls]

## Sheet: Table S1
Table S1 Oryza species and accessions used in this study.
Number	Accession	Species	2n	Genomic constitution	Origin
AA-01	Hejiang18	Oryza sativa japonica	24	AA	China
AA-02	Zuyunnuo	Oryza sativa indica	24	AA	China
AA-03	Zhechang9	Oryza sativa indica	24	AA	China
AA-04	Guihuahuang	Oryza sativa japonica	24	AA	China
AA-05	Zixiangnuo	Oryza sativa japonica	24	AA	China
AA-06	Guangluai4	Oryza sativa indica	24	AA	China
AA-07	IR30	Oryza sativa indica	24	AA	China
AA-08	Hanlunnuo	Oryza sativa japonica	24	AA	China
AA-09	Nipponbare	Oryza sativa japonica	24	AA	China
AA-10	93-11	Oryza sativa indica	24	AA	China
BB-01	IRGC 101417	Oryza punctata	24	BB	Kenya
BBCC-01	IRGC 83825	Oryza minuta	48	BBCC	Papua New Guinea
BBCC-02	IRGC 101128	Oryza minuta	48	BBCC	Philippines
BBCC-03	IRGC 101134	Oryza minuta	48	BBCC	Philippines
BBCC-04	IRGC 103874	Oryza minuta	48	BBCC	Philippines
BBCC-05	IRGC 103875	Oryza minuta	48	BBCC	Philippines
BBCC-06	IRGC 103876	Oryza minuta	48	BBCC	Philippines
BBCC-07	IRGC 103877	Oryza minuta	48	BBCC	Philippines
BBCC-08	IRGC 103878	Oryza minuta	48	BBCC	Philippines
BBCC-09	IRGC 103880	Oryza minuta	48	BBCC	Philippines
BBCC-10	IRGC 103881	Oryza minuta	48	BBCC	Philippines
BBCC-11	IRGC 105123	Oryza minuta	48	BBCC	Papua New Guinea
BBCC-12	IRGC 80768	Oryza malampuzhaensis	48	BBCC	India
BBCC-12	IRGC 105125	Oryza minuta	48	BBCC	Philippines
BBCC-13	IRGC 88828	Oryza punctata	48	BBCC	Madagascar
BBCC-14	IRGC 89163	Oryza punctata	48	BBCC	Mozambique
BBCC-15	IRGC 99570	Oryza punctata	48	BBCC	Tanzania
BBCC-16	IRGC 100125	Oryza punctata	48	BBCC	India
BBCC-17	IRGC 101409	Oryza punctata	48	BBCC	Ghana
BBCC-18	IRGC 104059	Oryza punctata	48	BBCC	Nigeria
BBCC-19	IRGC 105261	Oryza punctata	48	BBCC	Kenya
BBCC-20	IRGC 105982	Oryza punctata	48	BBCC	Cameroon
BBCC-21	IRGC 106292	Oryza punctata	48	BBCC	Chad
BBCC-22	IRGC 106304	Oryza punctata	48	BBCC	Nigeria
CC-01	IRGC 80730	Oryza officinalis	24	CC	Myanmar
CC-02	IRGC 81795	Oryza officinalis	24	CC	Indonesia
CC-03	IRGC 83815	Oryza officinalis	24	CC	Viet Nam
CC-04	IRGC 93255	Oryza officinalis	24	CC	Philippines
CC-06	IRGC 86466	Oryza rhizomatis	24	CC	Sri Lanka
CC-07	IRGC 103414	Oryza rhizomatis	24	CC	Sri Lanka
CC-08	IRGC 103417	Oryza rhizomatis	24	CC	Sri Lanka
CC-09	IRGC 105429	Oryza rhizomatis	24	CC	Sri Lanka
CC-10	IRGC 105450	Oryza rhizomatis	24	CC	Sri Lanka
CC-11	IRGC 81803	Oryza eichingeri	24	CC	Sri Lanka
CC-12	IRGC 81804	Oryza eichingeri	24	CC	Sri Lanka
CC-13	IRGC 89246	Oryza eichingeri	24	CC	Uganda
CC-14	IRGC 99567	Oryza eichingeri	24	CC	Tanzania
CC-15	IRGC 104608	Oryza eichingeri	24	CC	Sri Lanka
