# Supplementary material for: Development of Novel Microsatellite Markers for the BBCC Oryza Genome (Poaceae) Using High-Throughput Sequencing Technology
Source: PLoS One. 2014 Mar 14;9(3):e91826. doi: 10.1371/journal.pone.0091826 (PMC3954799; doi:10.1371/journal.pone.0091826)
Supplement: Table S2 — Characteristics of 495 microsatellite markers producing clear amplified fragments of the expected sizes. (XLS) [file pone.0091826.s002.xls]

## Sheet: Table S2
Table S2 Characteristics of 495 microsatellite markers producing clear amplified fragments of expected size.
Locus	Repeat motif	Forward primer (5'-3')	Reverse primer (5'-3')	Tm(℃)	Expected product size (bp)	Na	He	PIC
CN001	(CAGCT)4	TACAAGTGGGCTTAGGGTGG	GTCGAGCCAGTTCGTTATCC	59.7	100	2	0.297521	0.253261
CN002	(AGAGAA)4	CTCCACTCTCCGTAGATGCC	TCTCCTTTTCTCCCTCCTCC	59.749	104	5	0.495868	0.458934
CN003	(AGATGA)3	GTGCAGTTGCAGACAGAAGC	CACATCAACGATTTCATCGC	60.08	104	2	0.495868	0.372925
CN004	(T)20	GCTTGCATTGTTGGTGGC	AGACAGAAGCACCTTCGAGC	59.751	107	3	0.541322	0.43613
CN005	(AGT)6	AGGGACAGAATTGCTGATGG	ACCATCTACCTGGTTCGTGC	59.997	108	1	0	0
CN006	(TCA)10	AACCTGGTAAGGCATCAACG	GAGAAGTAAGGATGGCACCG	59.694	109	8	0.818182	0.794567
CN007	(TTCT)8	TCATGCTCTTGGACTGTTGG	TCCTCCAAACTCATCAAGGC	60.195	109	6	0.72	0.684825
CN008	(CTG)6	ATTGTTTGGGAGGAAGGAGG	TAGTCGAAGGATGGAATGGG	59.887	111	1	0	0
CN009	(CCTCCA)3	ATGGCTTAATGAGCACCACC	GAGGGTTTTGGGAAGACTCC	59.912	111	2	0.396694	0.318011
CN010	(CTGTGG)3	AATGGAGTCAAGTTGGCACG	GGTTGGCCACTAGTGTTTGG	60.41	111	1	0	0
CN011	(CTC)6	GCAAGGCAAAAGAGTATGGG	AAACAATTCGAAATGGTGGC	59.807	112	1	0	0
CN012	(CGG)6	CAACTACTACTCCTCCCGGC	ATGTTCGACGATGAGAACCC	59.934	113	2	0.489796	0.369846
CN013	(CTC)6	AAACCAGGATTTCCACCTCC	CTCTCAGCTGATCCTCCAGC	60.246	113	2	0.429688	0.337372
CN014	(ATGCAA)3	TAGCTCAAGGCTCAAGCTGC	CTTCGACTACCCGCTCTACG	60.03	113	1	0	0
CN015	(CGG)6	AAACCAAAAGAACGAAGGGG	TGAAGCCCAGGTTTATGAGG	60.066	114	2	0.197531	0.178022
CN016	(GGAAA)4	CTCTTCTCTCTGGGTGAGGC	CGAGTGGAGAGGATCAGAGG	59.937	114	3	0.569444	0.476755
CN017	(CGGTGG)3	AGCTGTAGTCGTCGTCCTCG	ATAGCCGCAACATGAGTTCC	60.103	114	1	0	0
CN018	(CTGTGC)3	TGCATGCACAAGAGAAGTCC	TTCATGAGTGCGATAGTGCC	59.83	115	1	0	0
CN019	(CTTTTC)4	ATCCACATGGCAAACTACCC	ACATCTTTTGCCACACATCG	59.572	115	1	0	0
CN020	(AGGTGG)3	GCTGAAGGTGAAGACCAAGC	AGCCTCCCTCTAGCACTTCC	59.979	116	1	0	0
CN021	(GA)17	TGTAGACCAAATAAGGGGCG	GCAAGTCCTGTTGCTGTACG	59.515	117	4	0.566116	0.505387
CN022	(AGCAAG)3	CAGTAGTAGAAGCCAGCCGC	CTTCTTCTTGCTTGTTCGGG	59.986	118	2	0.497778	0.373886
CN023	(GA)9	TGCCAGTTACTCACTCCACG	GTCACACAGCCTCACACACC	60.216	119	1	0	0
CN024	(CGTCTT)3	CTTCTTCTTCTCCGACGAGC	GAAGAACAAGAAACCGCAGG	59.853	119	2	0.489796	0.369846
CN025	(CTTCAT)5	AATGGATTTCTCGTTTTGCG	TGGGTTTAGCTGAATTTGCC	60.074	119	1	0	0
CN026	(AATT)5	AATGTGGATTAGGCACGAGG	ACGGGCATACTAATCAACGC	59.988	120	2	0.444444	0.345679
CN027	(AGGAAG)3	CTGTATCCACGTCTGGGAGC	CTTCTCCGGTATCCATCTCG	59.647	120	1	0	0
CN028	(CTTTAT)3	CGCACGTTAATATCACCTCG	GAAGACAATTCTGGTCGATGG	59.541	120	1	0	0
CN029	(AGGC)5	CATCCATGATGCATCTGTCC	GACGACATCGCTCCAACC	60.214	121	4	0.640496	0.580382
CN030	(CCACTT)4	TGAGCCAAAACTTGGGTAGG	TGTCGTTCTTTCCTTTTGCC	60.227	121	1	0	0
CN031	(CCG)6	CGTCTCGCCTTAGACCTAGC	TATACCTTGGTGTCTCCCCC	58.715	122	5	0.38843	0.37103
CN032	(CTCCGT)3	GATCGATCCTTCTGGAACCC	CAGTCGGAGGAGAAAAGTGC	59.989	122	2	0.18	0.1638
CN033	(CCGTTG)3	CCAGATCCTCAGGCTAATGC	TCAGATGACGCAATCAAAGC	59.955	124	5	0.571429	0.535456
CN034	(AG)10	AGGGGAGTAAATACAGCGGG	ATATGTGTGTGGTGTGTGCG	58.871	125	2	0.362812	0.296996
CN035	(ACCAC)5	TACCGAATAGTGTACCCGGC	CGACCGGGTTAATTAAAAGC	58.629	125	4	0.602041	0.552843
CN036	(ATCTAT)3	ATAGATCCCACGTGTCAGCC	GTCTTGGACTCGGATTTTGC	59.676	125	1	0	0
CN037	(GCT)9	CTTCTTGGTGGTTAGCTGGC	CAAGTCAAAAGCCCTGAAGC	59.993	126	3	0.44898	0.406497
CN038	(CCACCG)3	AATATTCACAGCGTTTGGGC	CGTGGAGAAGAGAAGAACCG	59.982	126	4	0.603175	0.53342
CN039	(CCT)7	CAGTTGGTGTGTAACCACGC	GTCCAACGTCAAAGACGAGG	60.69	128	2	0.495868	0.372925
CN040	(AAAC)5	GCAGTCATCGAGTCCCTAGC	TGCTTACTCATCATCCTGCG	59.972	128	1	0	0
CN041	(ACTTTT)3	TACACTCTCAGCACATCGCC	CTAATCCGCCGATACAAAGC	59.704	130	1	0	0
CN042	(CACTTG)3	CTAGCATCCCTCTCCTTCCC	GGAGAAAGACCACCAATAGGG	59.813	130	2	0.244898	0.21491
CN043	(CCACAT)3	TATGTCTCCACCCGTCTTCC	TCGATACTGCTTAGCGTTGC	59.234	130	5	0.595041	0.554419
CN044	(CTGCAT)4	AATACAATGGACCACCACCG	CGGTTAATTGTGCAACATGC	59.999	130	4	0.640496	0.580382
CN045	(TCC)6	GTGCCTGTAGTTCCCGTAGC	GGGAGGTGGTGAAGGAGG	60.457	131	1	0	0
CN046	(TCG)6	CTATGGAGACGAGCCAGAGC	GGCGAGCACTCTCACTATCC	59.981	131	1	0	0
CN047	(AAAAT)4	TACTGCCGATTAATGGAGGC	ATCGAATCCAAACAAGGACG	59.933	131	2	0.197531	0.178022
CN048	(CATTCT)4	AACAGGGTCACGTTCAGAGG	AAAAGATTGGAGCACATGCC	60.081	131	4	0.615702	0.560302
CN049	(TC)14	TACACGCCTTTTGTTCTTCG	CAACGATGATTATGATGCGG	59.914	133	1	0	0
CN050	(GAC)6	CGAAGTCAGAGGAGGAAACG	TAGACCGTTGCAAAACCTCC	60.11	134	2	0.375	0.304688
CN051	(CTCGAG)3	GGGGAGAGGAAAGAAACAGG	TAGGTTGAGGAGGAGAAGCG	59.569	135	1	0	0
CN052	(CAAT)6	TCTTCTTGTTTGCCTCTCCC	TCCATCCCAAAATTAGCTGC	60.038	137	2	0.124444	0.116701
CN053	(AATACT)3	TTCACACCCTTCATCAATGC	CCGTTTCAATTCACTTGTCG	59.17	137	1	0	0
CN054	(CGGCGA)3	GGGATTTTGGTCGAACAGG	GGCATAGGGCACTAATGAGG	59.551	137	2	0.207612	0.186061
CN055	(CCGGCG)3	CATCACCGATACAATCGTGG	TCAGCAGCAACTTGATTTGG	59.988	138	1	0	0
CN056	(CGAAGC)5	TCTCTCTCTCTCGCTGGAGG	ACAGCCTCTTATCCCACACG	60.134	138	3	0.595	0.527988
CN057	(GA)12	TCAGGGCTGGAAAATTATGG	CGAATGGTGGGTTATTTTGG	60.046	141	2	0.375	0.304688
CN058	(CT)17	CAAAATTTCAATGGCACACG	ACAATCCAGATTCCAGCACC	59.934	141	7	0.752066	0.721484
CN059	(AG)17	GGTTTCTGAGACCTTCGTCG	GGGTTAAGGAGGGATGAAGC	59.903	142	3	0.378698	0.343405
CN060	(AG)11	GCTCTGTTCCTGTGCTTTCC	GCAGAATCTCTGCTTCCTGG	60.096	142	5	0.55102	0.520721
CN061	(GTG)6	CTTCCAGCTCGCAGACTACC	AGCGCACCAAGAAGATCG	60.096	142	2	0.396694	0.318011
CN062	(CACGCA)4	AACTCTCGCTTTCTCCAACG	TTTTTGCAGATTTCGCACC	59.801	143	7	0.719008	0.685558
CN063	(CT)10	TGCAACTGTATCTAGGCCCC	TTAGTCAATGCGTGAGACCG	59.864	146	1	0	0
CN064	(GATC)5	AGTGAACAGTGGTTGGAGCC	ACTGCACGTACGAACAGACG	59.97	146	1	0	0
CN065	(AAACGA)3	CTCAGACAAGCCAAAAAGGC	AACAGTCAATTCACCCTCGC	60.119	146	2	0.35124	0.289555
CN066	(AAGATA)3	ACCTGCATCCTACACTTGCC	TATTGTCACCTCGTTTTGCG	59.729	146	3	0.291667	0.27228
CN067	(CTTCGC)4	AGACGGGCTAAAACCCTAGC	CTTCGCGGTAGAAGAAGTCG	60.147	146	3	0.539683	0.436814
CN068	(CTC)6	TTGTCCAGAGTCCAGATCCC	AAACAAAGTGAAGATGGGCG	60.11	147	2	0.46875	0.358887
CN069	(CGGTCA)3	TTGTGACACCACCACTAGCC	GAGCCACGCAGAATTAAAGC	59.988	148	2	0.375	0.304688
CN070	(GAATCG)3	TAAGGATGAAAACCGCTTGG	CCGTATTTGCTCAGTTTTCG	58.438	148	1	0	0
CN071	(AGCGAG)3	AGTTCAAAGGCCCTGTAGCC	GAGTGACCACAACAACACGC	60.211	149	2	0.359862	0.295111
CN072	(CTGCAT)3	TCCTCCTCAAGATCCACACC	TAAATGCAGAATCGCTGACG	59.976	149	3	0.503401	0.416
CN073	(GAC)6	CAGCTCCAAGAGGAATTTCG	CCGCACCGAGCATACTACC	61.609	150	2	0.375	0.304688
CN074	(ACC)7	ACAAACCCTACCTCAACCCC	GATTCTAGGGTTTCTCCGCC	60.039	150	3	0.54	0.4662
CN075	(TGC)7	TTCCAATCGAAATCTCCTGC	AATATTTATGCGTGCCTGCC	59.956	150	1	0	0
CN076	(CAAAA)4	ACCAACACTGAACTTTGGGC	GTCTCGAGCTGAGGAAAAGG	59.162	151	2	0.396694	0.318011
CN077	(CTC)6	TATCGCAGTTTCTGTCACGG	CTTACTTGTGCCAGTCTGCG	59.658	152	1	0	0
CN078	(CTTT)5	TGCCTTTCTTTTGGAAGTGC	AGAATTGGGGCCATTTTACC	60.02	152	1	0	0
CN079	(AGAGGG)3	AATCTGTCAATGGGCAGTCC	CGCAACTCACATAGAAACGG	59.342	153	3	0.512397	0.444232
CN080	(CGCCTC)4	CTCTCTCCCTCTCTCTCCCG	TTCTTCTCTCTTCCCTCCCC	59.749	153	2	0.375	0.304688
CN081	(CTG)6	AATGCACAACAAGTCTCCCC	ATCTGGAAGGAGCAATGACG	60.218	154	1	0	0
CN082	(AAAATG)3	ATTTTGTTCCGATGGTCTCG	GTTAGGGATGAAAACGGTCG	59.429	154	1	0	0
CN083	(AGAGCT)3	TGAGCTTGGCCACTTACTCC	TGCCATATTGCTCATGTTGC	60.642	154	2	0.396694	0.318011
CN084	(CAT)6	TCACAATACTTCGCAAACGG	TGACTTGCTACCAGGGAAGG	60.246	155	2	0.110727	0.104596
CN085	(GGA)7	GTAAAGCAAATCGCTCAGGC	CTTAACGACCATCAACAGCG	59.342	155	2	0.48	0.3648
CN086	(TTCT)5	GAAGAGATGTTGGGCTACGC	TGTAATCGTGAGACATGGGC	59.527	156	1	0	0
CN087	(CTC)6	GTTGTGGTTGTGGAAGAGGG	TTATTGGGCAGGAGATGAGG	60.029	157	2	0.304688	0.25827
CN088	(CAG)6	GACCTAACCACCCCTCATCC	GCTAGCAGTAAGCACAGGGG	60.037	157	1	0	0
CN089	(GGC)7	TGTAGGATTTGGCAAGGAGG	GACGTAAGCAACCCAACAGC	60.699	157	2	0.244898	0.21491
CN090	(TGA)7	GTGAGGAAGAAGATGCAGCC	AAATCCCTGTCATCACCAGC	59.934	157	3	0.507812	0.427704
CN091	(CCA)6	GGAGAAGATGCCCTTCAGC	TGATGAGGAGTTTGTGCAGG	59.831	158	2	0.429688	0.337372
CN092	(GCTCG)4	AATGATGACTTGGCGTAGGG	CGTTAACAGGCCTAACGAGC	59.904	158	2	0.117188	0.110321
CN093	(CAAC)5	TTGGTGATCGAGCACATAGC	AGATTGATTCACATGCGTGG	59.527	159	1	0	0
CN094	(AAAAAG)3	GAGAAGACAGCAAACCAGCC	TTGGTAATCGTGTGCAAAGC	59.735	159	1	0	0
CN095	(CGATCT)3	AGTGGGACATCATTCTTGGC	AAAGAATGCAAGTGGTTGGC	60.118	159	1	0	0
CN096	(CCG)7	CAATCCATGTCAGATCCACG	CAAAAAGCCCTAGAGTTGCG	60.011	160	2	0.495868	0.372925
CN097	(TCG)6	GGATCGAACCTTCTTGGACC	TGACGATGAAGAGGACAACG	59.831	160	3	0.458678	0.387294
CN098	(GAATAC)3	ACAGCCGTCTGAATACGACC	TAGGGTGTACGGAAACTGGG	59.846	160	1	0	0
CN099	(AAAGG)4	TCTGTGGATCACAAGCAAGC	ATAAAAAGGGAAGGCATCCG	60.272	161	1	0	0
CN100	(TTTTC)4	CGGTAAGCTCAACTAACGGC	GCCAAAACCAAATCATCTCC	59.368	161	3	0.272189	0.255173
CN101	(GATTT)4	GTACGATCAACCACCCATCC	GTGGCATCGATACACACACC	59.845	161	4	0.632231	0.587281
CN102	(ATATAC)3	TGGAGGGTTATAATCAGCGG	AAGACATTGGAGCTTGACCG	60.255	161	2	0.444444	0.345679
CN103	(CCACCG)3	GTCTCCTAGCTCCACCTCCC	CAACCACCATGTGATGAAGC	59.967	162	1	0	0
CN104	(CCTCAA)3	TTCTTCGTTGTTCGTACCCC	ATCAATCTGGTCCATCAGGC	59.893	162	3	0.595041	0.526194
CN105	(CCTC)5	AGGCAATGCTTTCTCTGTGC	GCTACACCGCTAAAGATGGG	59.73	164	1	0	0
CN106	(AGGCGG)3	TCCATAAAGCCAACGAGAGAG	GGCAAGCTCTACCGCTCC	61.058	164	3	0.554688	0.455536
CN107	(CTCTGT)3	TTTTCTCTTTTGACCTCGCC	TTCTTTTGCAAATCGAACCC	60.053	164	1	0	0
CN108	(TTTAT)5	GGGGAGAAATACCGGTAAGC	ACCTCACATCTCAACCCTGC	60.12	165	1	0	0
CN109	(CAACGG)3	ATCAGATAACGCGGTCAAGG	TGCTGGTTGTTAGACGTTGC	59.911	165	5	0.65625	0.594543
CN110	(CCGCCT)3	GAAGCACATCTTCTCGGACC	AGATCTGAGAGAAGCCACCG	59.555	165	4	0.60771	0.562255
CN111	(CCGTCG)3	AGAACATCACGGAAGGATGC	TGAGGCAGCAGTATTTGTCG	60.011	165	2	0.408163	0.324865
CN112	(GAAGAG)3	CATCTCTCCGTCTCTCTCCG	CCAAGAACGCCACTAACTCC	59.734	165	1	0	0
CN113	(GACATG)3	TCTTCTTGTACATGGTGCGG	CATCCTCCACCTTGAGTTGC	60.656	165	1	0	0
CN114	(CT)9	ATCAGCAGATGGCTCTGACC	CCCCCTCCACTATCTTACTATGC	60.224	166	4	0.615917	0.554639
CN115	(CCG)6	GGGTCCAACCTCAGGTCC	CAGGAGAGGAAAAAGGGAGG	60.175	166	1	0	0
CN116	(CCTCT)4	GCCAACAAGCTTCTCCTACG	AGTTTTTGCAGGTGTGTCCC	60.012	166	1	0	0
CN117	(ATCGG)4	GCATGCTACTCCAGCTACCC	CGTACATACGTGGACCATGC	59.871	166	3	0.595041	0.526194
CN118	(CGACAC)4	TCCTGGACAACTTGGAATGG	GAAGAAGCACTCTTGGCAGG	60.134	167	3	0.526316	0.432716
CN119	(AAG)6	ATCTTCCGAATTGACAACGC	CGCCAGTTCTTCTTCTTTGG	59.986	168	3	0.460938	0.397675
CN120	(CGGCTC)3	CTTTCAACTTCGCTCTTGCC	TCAAGCACAAGTTCAGTGGC	60.032	168	2	0.46875	0.358887
CN121	(CT)15	CAATCTGCAGCATTTCATGG	GAAGCAACAGAAGACCAGGC	59.997	169	3	0.367769	0.325686
CN122	(GAG)6	ACGTGGTATTGCTGACCTCC	ACTTGAGCATCCATTCCAGG	60.073	169	1	0	0
CN123	(AATC)5	CGAACTACTTCCAGTTCCGC	ATTCGCCACAATGAAGAACC	59.939	169	6	0.809917	0.781658
CN124	(TTGTG)4	ATTCAGATTCACCTCCGACG	ACCCACGAAAAGGTGTATCG	59.853	169	1	0	0
CN125	(CGG)6	CTCGTTGTCCTCCTTGAACC	TGTTGCTCAGATAGTTGCCG	60.011	170	1	0	0
CN126	(CAGGAG)3	AAACGAAAACCCACAGTTGC	GTCAGTCACACGTTGTTGCC	60.211	171	3	0.309917	0.282178
CN127	(CGGAGA)3	GATGACTTGGAGGAGGAACG	AGATCTGGACCGTTTGTTGC	60.119	171	3	0.582645	0.507573
CN128	(CGGCGA)3	AGGCATGAGAACAAAATGGC	TTTGCCTTGTAGTGTCGTCG	59.904	171	3	0.541322	0.43613
CN129	(CGGTCG)3	CTCCCTATCCTTCTCGTCCC	ACACTCGAGCGCAGATCC	60.105	171	2	0.33241	0.277162
CN130	(CA)10	GCAATGCATTAGCATTATCTGG	GGATCGAGTTGTCCATCACC	60.335	172	4	0.63	0.586125
CN131	(TCA)6	CAACTGGTTAGGCTTCTCGC	GAAGAGGAAGTTGCAGGTCG	59.989	172	3	0.595041	0.526194
CN132	(TCT)7	CGAGTCTCTTTCGAGGATGG	ATTGGTCCAGACCAGACTGC	60.12	172	3	0.461538	0.404188
CN133	(CACTA)4	AAATACGGAAGCAACCATGC	CTTGGTGAACACCACCACC	59.829	172	4	0.615	0.561488
CN134	(ATGCCA)4	CAGGAGAAGCCTTCATTTCG	TAGTAGTCTCTCCTCGCCGC	59.74	172	1	0	0
CN135	(AC)27	AGTGCCACTTACCTGCATCC	GGAAAGATCATCGCAAGAGC	59.923	174	6	0.632812	0.599396
CN136	(GGT)6	ATCATTTGGGTCTGAGCTGC	ATTCTGGTTCGGCCTACTCC	60.464	174	1	0	0
CN137	(CTTTTT)3	TTTTCTTGAGTTCCCCATGC	CAGTGAGAGGAGTTAGGCCG	60.005	174	1	0	0
CN138	(GACTAG)3	GCTAATTGAGGGGAAGGAGC	TTCCTAATGCATCCTGGTCC	59.894	174	2	0.375	0.304688
CN139	(GCA)6	CTCTTCCAGCTCATGCTCG	AGTCGGAAATGGACTTGACG	60.111	175	3	0.429752	0.385493
CN140	(CAG)6	CAGAGGCCATAAGAAGCTGG	ACAGCTGTTGTTGGTAAGCG	59	175	5	0.643991	0.596171
CN141	(ATC)7	AGCTCCACTGATCAACCAGG	TGTTCCTGCTCATGTCATCC	59.637	175	5	0.63	0.586725
CN142	(GATC)5	GCTAGCAATAACTCCCGACG	GCTCACGCATTCACTACTGC	59.627	175	3	0.615702	0.54186
CN143	(CTAT)6	TGGTCATGTTGGATTGTTGG	TAGATCCAGTGCAGGTGTGC	59.862	175	3	0.623967	0.553267
CN144	(AGATAA)3	AGACATGGTGAGTGCTGACG	ATTCTACGTATGGGCGATGG	59.807	175	2	0.498866	0.374432
CN145	(CGGAGG)3	AACCCTAGCTACACGGGAGG	TGCAGCGTCTACAAATCAGG	60.011	175	2	0.297521	0.253261
CN146	(TTCTGG)3gagg(GCCCCT)3	GCTTGTCCTGGAACTTGTCC	GATGTATGCCGATCCAATCC	60.126	177	1	0	0
CN147	(TCA)6	AAGCATGTCTGAGTGCATCG	ACCTCAAATGGTATGGTCCG	59.67	177	1	0	0
CN148	(TGCAT)4	GTAGGCTGGGGAAATTCGG	CACTCGCATTGTGAATTTGG	60.111	177	1	0	0
CN149	(TC)9	AAGAACCAGAGCAAGATCGG	CCCACGGCTACAAATACACC	60.249	178	6	0.6	0.570225
CN150	(CGC)8	TAATCCGAGGACCAAAGTGC	CTGAGCGTAGGATGAGGAGG	59.966	178	4	0.597222	0.552373
CN151	(TATTT)4	TGTTCATTAGTGCATTCCCG	ATCGATCGAATCATGCAAGC	61.124	178	2	0.495868	0.372925
CN152	(AGTTTG)3	GTATCCATGCCAACTCCACC	TTTAGCCAAGAACTGGCACC	60.249	178	2	0.495868	0.372925
CN153	(ATTTTT)3	CGTTATGGTCCCTTCACACC	ACAAGGAGACACCAACAGCC	60.159	178	1	0	0
CN154	(GACACC)4	TTCCAACAGCAACAAACAGC	GAAGAAGCACTCTTGGCAGG	60.134	178	1	0	0
CN155	(GT)10	ATTCCCCATTAAAGCACACG	TCCGCGTTTTTATCGTATCC	59.928	179	5	0.739669	0.702505
CN156	(AGG)6	ACGTCGACCTCTTCACAAGC	CTTCCTCCACAGCTCACTCC	59.986	179	2	0.297521	0.253261
CN157	(AAAT)5	GGAAGTTTCCAGGGTTACAGC	TGGTTGCCATCTAGACATGC	59.679	179	2	0.471655	0.360426
CN158	(ATAAG)4	TTCATGCACCCTTTTGATCC	GGAATTTTATAATCCCCGGC	59.493	179	1	0	0
CN159	(CGGATG)3	TGTAGGGGTGAAAATGGAGC	CAGATAATCCGAATCCGTCG	60.427	179	3	0.533058	0.431554
CN160	(AGAA)5	GAAAAACAAAAGTCGCACCC	ACCGAGCCTAGACACAAACG	60.312	180	1	0	0
CN161	(AGTTGA)3	ATGGGAACATTTTGAGCAGG	CCGACCAATTGCTATGAACC	60.331	180	1	0	0
CN162	(CAATAC)3	CTAGACAGCAAAAGGGTGGC	TTGCAATTGCTTCATTTTGG	59.679	180	2	0.35124	0.289555
CN163	(CCGCCT)3	GTTTCACCCTCTCCCTCTCC	GATCTGACTTCTCCAACGGC	59.81	180	3	0.337778	0.309175
CN164	(GCG)7	ACAGGAGTTGCTGGAGATGG	ATCTGTTGAAGGTCTTGCGG	60.255	181	2	0.35124	0.289555
CN165	(GCT)6	AATCGAGGTCGTGAAATTGG	TCACTGTCTCTCACCCTCCC	60.243	182	2	0.345679	0.285932
CN166	(AGGAGC)5	TCGAAACAGTCGTAGCATCG	CACCGAACGAAACATACACG	60.027	182	5	0.706612	0.665759
CN167	(CTGC)6	GGTTTAGTGATGTGACTCGCC	TACCTTGGCCATTGGTAAGC	59.96	183	3	0.595	0.527988
CN168	(ATCTA)5	AACTGACAGATCGAGCAGGG	AATTAAAGTTGCAATGGCGG	59.964	183	3	0.595041	0.526194
CN169	(CTCCTG)3	GACCTTCTCGCCTCCTCG	GGATTCCCCTTTTTCTTTGC	59.888	183	4	0.484375	0.443176
CN170	(TGCTC)4	AGAGCCATGATGAGACGAGG	ACATAATACCGGAGCATCGC	59.951	184	3	0.541322	0.43613
CN171	(ATGAAG)3	GGAGCACATGGAAGAGAAGC	AATGGATTTCTCGTTTTGCG	60.074	184	1	0	0
CN172	(CAATAC)3	TGGAAATCAGAGCTCCAACC	TGTAACCACTTTGCTGACCG	59.758	184	3	0.367769	0.325686
CN173	(CGGCGC)3	TACTGATCGATGCAAATGCC	ACTCACCATGATCGACCTCC	59.928	184	2	0.396694	0.318011
CN174	(T)18	TACCAGCTCCTTCTGATGGC	ACTTGTTAATCCAGTGGCGG	59.993	185	1	0	0
CN175	(TGC)7	TCGAGATTATACCCGTTCGC	TTGCAGGCACTGTTACAAGC	60.058	185	2	0.46875	0.358887
CN176	(GAA)7	AACGGATGATAGTTCCAGCG	GTATAAGCGAAGCAGGCAGG	60.003	185	4	0.640496	0.580382
CN177	(GGAG)6	TGTGTGTCACTCAACACCTGC	GATCCCTGTTACCACAACGG	60.232	185	3	0.326531	0.30259
CN178	(GAATC)4	CAAAAAGCTCGCCACTAACC	AGCACTACTAGCACCGTCGC	60.623	185	1	0	0
CN179	(GAGCT)4	GCTTTGTTCCTGATTTTCGC	ATCAAATCCACACGAAAGGG	59.79	185	3	0.561983	0.476197
CN180	(AAAAG)4	ATTGGGCCTGATCTACATGG	GCTAGCATTATCGTCGAGGC	59.973	185	3	0.309917	0.282178
CN181	(CAACGG)3	TCTGACGATGCAATCAAAGC	TTGTCGTAAGCAGCAACTCG	60.195	185	1	0	0
CN182	(CGAACT)3	TTCGATTTGATGCTCTCACG	GGAAGCAAGCAGATCTTTCG	60.096	185	1	0	0
CN183	(CT)9	CACTTCGGTCTCTTTCAGCC	TCTCACCTGATCTCCTTCCC	59.18	186	6	0.72314	0.690757
CN184	(CGC)6	GTACACGCACTTGTTCTCCG	CCTTCTCATCGTCTCCTTCG	59.943	186	1	0	0
CN185	(ATT)7	TAGCATAAGGATCATCGGGC	CACGGTGTACGATTACGACG	60.05	186	3	0.378698	0.343405
CN186	(TA)10	AGGAGGTGGTGAAGTTGACG	AAGGGAGAAACCCTAGCTGC	59.848	187	5	0.640496	0.601282
CN187	(GAA)6	GGAAGTGTCCGAGAGTGAGC	AGCACAAAGTTGATGGAGGG	60.111	187	2	0.495868	0.372925
CN188	(AGAGGC)3	ATCGTCCTGAAGATGGATGC	GCGATGTCTTATCCTTTCTCG	58.941	187	1	0	0
CN189	(CCTCGT)3	ATCGATGCACACTCAACTGC	ACAATGATGGAGAGGAACGC	60.081	188	2	0.152778	0.141107
CN190	(CCTTCA)3	ACCATCCTTGTCATGCTTCC	CCATTGTTGATGTGGAGTGC	59.967	188	2	0.260355	0.226463
CN191	(CT)11	CTCTACCTCCCCTCATCGC	TCCATGTCCTGCTAAAACCC	59.933	189	4	0.601562	0.547089
CN192	(GCT)9	TCTGTGCTGATGAAACTGGC	GCACCACACAAGACAACACC	60.055	189	2	0.408163	0.324865
CN193	(GCA)9	AAGAAGAAGAAGAAGGGCGG	AGTAGTCGTCGTCGTCCTCG	60.466	190	2	0.5	0.375
CN194	(TGC)6	AATGCCAATAAATGCAAGGC	CTTGTTGGATGTCTGCATGG	60.112	191	1	0	0
CN195	(GGA)6	TCTGAGGTGATGAGCTGTGG	ATATGATCAAGGTGCTCGCC	60.066	191	1	0	0
CN196	(AAAGA)4	GAGGTGCCAGTATGTCATGG	ATGGGTAAGGTTTTCCCTGG	60.046	191	1	0	0
CN197	(CCA)8	TCGAGTATACTGTGCGTGCC	GACGAGATCGGTGAGAGAGG	59.945	192	5	0.673554	0.631745
CN198	(TCA)7	CCTATGATGCGGTAGAAGGC	GGGAGGAAGAATCCAGAACC	59.874	192	4	0.583333	0.529514
CN199	(GTG)6	CCGACGAAGATCTAGTTGGC	ATTTGGATTCTTTGGGGTCC	59.996	192	2	0.495868	0.372925
CN200	(CGC)6	ATCAGGTGTCATCCTCCTCC	GCTCAGGGATGTCATCTTCC	59.617	192	1	0	0
CN201	(CTC)6	AGATGGACATCGACCTCTCG	GCTCGTCACAACTCACATGG	60.319	193	1	0	0
CN202	(AGCCGC)3	CATGGGTGACTTGTGTGAGC	CGTAATCCAAGTGATGCACG	60.134	193	3	0.615702	0.54186
CN203	(CAGCCA)3	AACAGTAACAACCGGAACGC	GTGTCGTCATCGATGTTTGC	60.128	193	3	0.46	0.4102
CN204	(CTCCGG)4	CAAGCTGTGCTACTTCTGCG	GATGCACCTTAGGAACTCGC	59.843	193	1	0	0
CN205	(ACGCCA)4	CGAGATTTGGATGCTTCTCC	GGGTGTGTGTATGCAGATCG	59.992	194	5	0.77686	0.740387
CN206	(CCAAAT)3	TGCCATATTTGAGCTGATGC	CAAGAGATGGAGGAGCAAGG	59.943	194	1	0	0
CN207	(CGGTCA)3	GGCTTAAAACCAAACCCTCC	TTGTGTAGTGAGGCGAGTGC	60.056	194	1	0	0
CN208	(TC)9	AACCCTAGTTTTCCCATCCG	AGGAGCCGATCTAGAGGTCC	59.801	195	3	0.541667	0.45978
CN209	(CT)19gca(CTCGAT)3	CTCTGAAATCGTCTGCTCCC	ATCGCAAAGTAAATGCAGGC	60.238	197	4	0.665289	0.604151
CN210	(ACAT)5acacacat(ATAC)7atatatatgtgtgtg(TATGTA)3	ATCGGTATCATATGCAGCGG	TTTGCTACATCCAACATGTGC	59.605	198	1	0	0
CN211	(CAAC)7	GGCTCAACAGAGACAGGAGG	TGCAAGCAGCAAATTAGTGG	60.014	198	3	0.595041	0.526194
CN212	(GCGAG)4	TATGTCTCGTCACAGCTGGC	GAGACGGGTAGGTAGGGAGG	59.95	198	1	0	0
CN213	(TAC)16	TCTCCCAGAGAACAAGGTGG	ATGGCTCTATCCCTGTGTGC	60.104	199	6	0.710744	0.672854
CN214	(AGA)6	CTTCCTTCTCTCCCTGTCCC	TGCATCTCCTGTGCTAATGC	59.979	199	1	0	0
CN215	(AGA)6	CTTCCTTCTCTCCCTGTCCC	TGCATCTCCTGTGCTAATGC	59.979	199	1	0	0
CN216	(AAG)6	AGGATGTAAAGCACCATCGG	TTCTGGAGTTCGCTTCTTGG	60.508	199	1	0	0
CN217	(CCAGCG)3	GGCTCCTGAAAACAATCTGC	TTCCAATCTCTCCCATCTCG	60.15	199	1	0	0
CN218	(CTATAT)3	AGCGGAGAGAAAGAAAAGCC	GCTCTCTTATGCCGCTATGG	59.967	199	2	0.117188	0.110321
CN219	(GTC)6	ATTCATCTGCCTCGATGACC	CTGTCTACGAAAAGGCCAGC	60.015	200	2	0.495868	0.372925
CN220	(GGT)6	GTGTAGTATCAGCGGGGAGG	CATGAGCATATTGACGACGC	60.251	200	1	0	0
CN221	(TCCTC)4	TCCCGTCAGTCTGAATTTCC	GAAGGAACTTTCCCTCCACC	59.912	200	2	0.396694	0.318011
CN222	(ATGCAA)3	GATGGGTCTGGTGGTTATGG	TTTTAAGGGTTTGCGTCACC	59.975	200	1	0	0
CN223	(GAT)8	ATGGTTCAAACAAGTTCGGG	AAAGGGTTTGGAAATTTGGG	60.027	201	1	0	0
CN224	(GTC)8	AAAACACGCTAATTCGACGC	ACGCAAATCTAAACAACGGG	59.996	201	1	0	0
CN225	(CAA)6	ATCAACCGATCAACTCCACC	TCATCATCGTTTGCTTCTGC	59.955	201	3	0.544218	0.48597
CN226	(CACCCA)3	ATCAACACCTCTTCGGTTGC	ACCGAGTGTTTTCATCTCCG	60.111	201	2	0.304688	0.25827
CN227	(CTTCCT)3	CCTGTCGCTACAAGACCTCC	TTCGAGGAGATAAACCACGG	60.066	201	2	0.117188	0.110321
CN228	(CAC)6	AGAAAGAAGAGGGGAGCAGC	CGTACTCGACCTGGAAGAGG	59.861	202	2	0.495868	0.372925
CN229	(TCG)6	TGACGACGATTGACAAGAGC	CAGGTAGACGACGGAGATGG	60.668	203	4	0.628099	0.580561
CN230	(GAC)6	GCCGTTGTCTTCAAGTCTCC	TGCAGTCACGGAGATACAGC	60.016	203	1	0	0
CN231	(ATTGCG)3	GCGAGAGGATTCAGAGATGC	ATTAATGGCCGTCACGTAGG	59.845	203	3	0.460938	0.397675
CN232	(CCGCAG)3	GGCTGACCTTTTCTTCCTCC	GCATGCTGGAGAAGATAGCC	59.946	203	1	0	0
CN233	(CTACTG)3	CCCTCTTTTCTTGTTGCTCG	TTAGGGAGTACCAGCAAGCG	60.399	203	1	0	0
CN234	(CTC)7	TTCCAGAGTGAGAAGCACCC	AGTGGAAGGAGGAGGAGAGG	59.801	204	2	0.297521	0.253261
CN235	(GACGGC)3	AAAAACCCTCGACTCATTGG	TAGAAGAGGAGGGGAGAGGG	59.766	204	1	0	0
CN236	(CAT)7	ATTTCCTCCCATGAACTCCC	TTGATCCTCCCTTCATGAGC	60.158	205	1	0	0
CN237	(ACC)6	AATTAAGCTAGCTCGTGCCG	CCACCAAACAACACATCTCG	60.001	205	1	0	0
CN238	(AAGG)5	AGAATGTTGTCGAGGATGCC	TCCTTGTATTCCTCCCCTCC	60.264	205	1	0	0
CN239	(GAAAA)6	ATCTTTCCGTGGTACGTTCG	ATTAAAGCAAAGCTCGCTGC	59.769	205	3	0.615702	0.54186
CN240	(ACCCGA)3	GAGACATGTTGAACTCCGGG	TCACTTGTTGAACCGTTTGG	59.585	205	3	0.64876	0.573552
CN241	(GCA)13	TGGTGGTATGAAGGAGGAGG	ACCTAGGAGAGGAAGCCAGG	59.834	206	2	0.433884	0.339757
CN242	(GAAA)6	GGTTCAAACTTGAAGCTGGG	TTGTTCCACACTCATCTCCG	59.676	206	2	0.495868	0.372925
CN243	(AGAGG)4	CTCCTTCCCTTTCCAGAACC	CTCTCCGAGTACCTGTTCGC	60.012	206	4	0.640496	0.580382
CN244	(CGCGCT)3	TCCAATGCTTATCTCCTCCG	TCTCCGTTTACTGACCTGGC	60.255	206	2	0.0867769	0.0830117
CN245	(CTCCTA)3	CATGAACAGCTGATGCAACC	TAGCTCATGCTTCTGGGTGG	61.336	206	3	0.580499	0.51567
CN246	(AG)15	GGTCAAGTCAAAAGAAGGCG	GAGAGAGGTGGGAGGAAAGC	60.336	207	5	0.595041	0.554419
CN247	(GA)10	TTGTGGTCACAGTTCTTGGC	CTCCAGCTACATGGGAGAGC	59.973	207	3	0.60771	0.537081
CN248	(TAC)11	GGGGAAGACGAAAGATAGGC	TAGCGACCATGCTAGTGCC	59.987	207	6	0.719008	0.674698
CN249	(CTGCCA)3	ACATAAAACCGGACCCATCC	CGCAGATTAGCAAGAGGAGG	60.11	207	1	0	0
CN250	(AGA)6	TGCAAACAAGACAATCAGGG	GATTGATTGGTTGATTCGGC	60.282	208	1	0	0
CN251	(ATCG)5	ATCCTGATCGACCTGACTGG	AACAATGCAAGTTTCCCTGC	60.118	208	1	0	0
CN252	(GGCAT)4	TGCTGCCAAGACAATGTAGC	AGGACAGGATATGCCACTGC	60.104	208	1	0	0
CN253	(TCTTC)4	GGACGAAAAACCTAATCCCC	TAACACTGATCCGCACAACG	60.72	208	2	0.165289	0.151629
CN254	(CGAAA)5	ACTTGTTCGTCGTCAGGTCC	TCTCATTCAGATCGATCCCC	59.971	208	1	0	0
CN255	(ACATTC)3	TTCTGGTGTACAAAACCGGG	GCTTCAACAATTTGGCAAGG	60.617	208	3	0.557851	0.490156
CN256	(AGCAAA)4	AACGCTGCCATGCTTATACC	GCTACTCGAGGGGAAAGTCC	60.212	208	1	0	0
CN257	(AGCCCA)3	CCGTGTTGCTAAGATAGGGG	GATGGATCGTTTTCCTCTGG	59.483	208	2	0.32	0.2688
CN258	(ATCTTT)3	AGGGTTTTGAACTCCCAAGG	TCACTTCAGTTTGACGGACG	59.873	208	1	0	0
CN259	(CCGTTA)3	GCTGCATGTTTGTGATTTGG	AGAAGCAATCGAGAAGCAGC	59.866	208	3	0.337778	0.309175
CN260	(CTTTTC)3	TAGCCCAATGAAGTTGAGGG	GGAGAGAGAAAAAGGAGAAGGG	59.833	208	2	0.444444	0.345679
CN261	(GA)11(GT)9(GA)10	TTTGGGACAAAGGGAGTAGC	GATCCTAGCGCGTCTACAGC	60.147	209	3	0.541322	0.43613
CN262	(GGC)6	TAACCCCCGGAAACTAAACC	GAACAGCTTCCTCCTCTCCC	60.336	209	1	0	0
CN263	(CTC)6	AAGGTTGGAAATTTGGGAGG	ATAATCTTGAGGGGGCATCC	60.117	209	4	0.706612	0.655514
CN264	(AAATC)4	CAGGGCAATACTGAACATCG	CTATTCGATTCTCCCCCTCC	59.859	209	2	0.498866	0.374432
CN265	(ATTTTT)3	TGCTAGCAATTGATTCACCG	TTGGTGTACCTGATCCCTCC	59.779	209	3	0.460938	0.397675
CN266	(CATGGT)3	ACTGATTTTGCAAGTTGGGG	ATGGCTTTAACGTGGATTCG	59.96	209	3	0.460938	0.397675
CN267	(CCTCTC)3	CCCTCTCTTACTCCCTTGCC	ACACCTCCACTACCACTGCC	60.033	209	3	0.243802	0.228357
CN268	(GAAGAT)3	CTCCCTTATGATGAGCAGGC	AGATGAATGGACATGGGAGC	59.893	209	1	0	0
CN269	(GAGGAC)3(GACGAT)3	AAGGATGAGGACAACGATGG	CACCGTTCCATCCAATAACC	60.051	210	2	0.375	0.304688
CN270	(CT)9	AACGTTAGTCCAGTGCAGGG	GAACAATCTCTCGGCTTTGC	59.962	210	2	0.0907029	0.0865894
CN271	(TG)14	CAAGTTGCATTTGGACATGG	ATTGCCTTCACGTTTTGTCC	59.978	210	2	0.5	0.375
CN272	(GAG)6	CCAGATTGAAAAGGCAGAGG	TACTCGTCGGTAGTCTCGGG	60.269	210	8	0.84375	0.825256
CN273	(TTC)6	TGCTTCTCCTTTTCTGTTGC	TACGAACATCCCATGTGTGG	60.24	210	4	0.601562	0.547089
CN274	(CGCCTC)3	TTGTTACGAGGAGGAATGGC	TCCAAGCTCAAACTCACACG	60.025	210	1	0	0
CN275	(CAACGG)3	CTCTTATGCCAAATCCGACG	GCATTTTGGTATTTCCACCG	60.188	211	2	0.152778	0.141107
CN276	(CGAGGC)3	GGCAAAATAAGGGAAGAGGC	TGAGCATCCTAATCCATCCC	59.854	211	3	0.367769	0.325686
CN277	(CTAGCC)3	ACTTGTTAGTCCAGCCTGCG	GCGCGAGTTGATTAGTCTCC	59.985	211	2	0.495868	0.372925
CN278	(CCG)6	CCTACCTGACAACGTGGACC	CGAGGTGTTAAGCATAGGGG	59.587	212	5	0.756198	0.714731
CN279	(CGGTGG)3	GGGAGCTTCAAGAACACAGC	TCAAATTCACAGCCTCCTCC	60.195	212	2	0.297521	0.253261
CN280	(GAC)7	ACGCTACTAGTACGCTCGCC	TGGTGAAATCAGGAAGAGGC	60.195	213	2	0.297521	0.253261
CN281	(GCGA)5	CATGATTGAACTGGTGACCG	GCGTGGGTAGAGAGAGATGG	59.827	213	1	0	0
CN282	(ATCTTT)3	ACACACCACACGAGAACTGC	TTGGAACCGAGATGGATAGG	59.887	213	2	0.359862	0.295111
CN283	(CT)9	GATGAGGGTGACAGAGAGGC	AGTGTATCTTGCTCCACCGC	60.285	214	1	0	0
CN284	(ATTA)5	CTAGCTTGGTGCACTTGTGG	ATTATCAGCAAACGCCAACC	59.967	214	1	0	0
CN285	(ACTC)5	AGAAAAATGGATGCCACTGC	CATGATCTGTGGATTGGTCG	59.918	214	4	0.578512	0.525801
CN286	(CCTCTT)3	TGAAAGTATGGAACAGCCCC	TCATCTGCCTATTTCCCTGG	60.029	214	3	0.595041	0.526194
CN287	(CTTTAT)3	CGCACGTTAATATCACCTCG	TTAAGAAGGCAAATCGGAGC	59.433	214	1	0	0
CN288	(TTTCG)4	GAACATGGAACACATGCACC	CAGAATGGTGTGCAGAATGG	60.112	215	2	0.172336	0.157486
CN289	(AGAGCA)4	AATTGACCAAAGCACAAGGC	CTGGCAGCTCTTCAAAATCC	59.955	215	3	0.580499	0.51567
CN290	(CATTGC)3	GACTTCCATCGGAGAAGTGC	TCCCAGTCAATCTAGGTGGC	60.073	215	3	0.429752	0.385493
CN291	(CTGCAC)3	ATGCCTGTAAGGTCAGCACC	TCATCATCCTGGTCATCTGC	59.591	215	2	0.297521	0.253261
CN292	(TC)9	TCCAATCCCTACCTTTTCCC	TTGTCGAATCTGGATCATGC	59.61	216	3	0.309917	0.282178
CN293	(CTCGAT)3	ATAGGGGTTTTTCACCCACC	TCATTGCCTGTGACTTGAGG	59.831	216	4	0.56	0.501096
CN294	(ATCG)6	TCATCTCCCATTTCCTCTGG	TCGATCTCATAATCCTGGGC	59.998	217	2	0.396694	0.318011
CN295	(ATAAAA)3	CCGATCCCTAAATTGATCCC	TGTGTGTGTGTGTGAATGGC	60.053	217	3	0.541322	0.43613
CN296	(CATTTC)3	AAGCCGGACTTTTTATTGGG	GGGATCAGGGATGGATTACC	60.354	217	3	0.442907	0.383903
CN297	(CGCCGG)3	TAAGCAGGGGGTTATTGACG	TTTGTGAAATGTCTGCAGCG	60.988	217	2	0.408163	0.324865
CN298	(TCT)6	CCTTTTCTTCTCCTCACCCC	ATACAGCCACATTGCCTTCC	59.962	218	1	0	0
CN299	(CGG)6	TGCAGTGCAGAGAAGACTGG	GCTCCCCTCCTACTACCACC	59.957	218	3	0.595041	0.526194
CN300	(CAATGG)3	GAGACAGCCAACTCCTACGC	TCGGCTACATTGTGTGAAGC	59.871	218	1	0	0
CN301	(CGCCTT)3	CATCTCGCACCCTAGAGAGG	AGGAAGGAAGAAGGGTGAGG	59.671	218	4	0.581315	0.529017
CN302	(GA)9	TTTGCAGGTACATCACTCGC	TTTCTCGTCCTGCATCTTCC	60.34	219	1	0	0
CN303	(GCCAC)4	CTGGTTGCATTTACACTGCG	AGAGTCTACGAGACGGAGCG	59.769	219	4	0.615	0.561488
CN304	(CATATA)3	CATTGAACAAGGGGCATAGG	ATTTTCCAGCAACGACTTGG	60.11	219	5	0.68144	0.634249
CN305	(TGC)6	TTGAGATTCATGCTTCTGCG	GCTTCCAACTGAGCATCTCC	59.957	220	2	0.495868	0.372925
CN306	(ATG)12	GCTCTGAATTGCCTACCTCG	GAGTAAAAAGCCAACGACGC	59.889	220	3	0.429752	0.385493
CN307	(CTTT)6	GCAGAGCAGGCAAAATAAGG	AAATGAAAAGCGATGGATGG	59.901	220	3	0.429752	0.385493
CN308	(CGAT)5	TGTGCGTACTATACGCCTCG	TCGGTCAACAATTCAACAGG	59.541	220	1	0	0
CN309	(TTTCT)4	ATGCGAGCAAAATCTCATCC	TCATTCATCAAGGGCCTAGC	60.177	220	1	0	0
CN310	(CCG)6	TGGGAATGAGAAGGAAGACG	TGTCCGCTACTACTGATGCG	60.035	221	1	0	0
CN311	(AC)28	TCGATCAACGAATCATCAGC	ACGTACGCTGCATACATTGC	59.788	222	3	0.64876	0.573552
CN312	(GAG)7	GAATCTTCGTCGATTGGAGG	TCAATCTCGTCTTCATCCCC	60.011	222	1	0	0
CN313	(AAT)7	TCCCAGACGAGTTTAGGTGC	ATCAAGCCACTTTTGGATGC	60.081	222	2	0.5	0.375
CN314	(AGCT)5	TACCATGTACCGACGACACG	ATCGTAATCCAATGCAAGCC	59.929	222	5	0.739669	0.702505
CN315	(CCCTTG)3	CATGAACATGATCGAGCTGC	ATCTGGGATCCACACTCTGC	60.08	222	1	0	0
CN316	(CTCCGT)3	AATCCATCCCCATTTTACCC	CTTCTTCACGTTCTCCCAGC	59.989	222	2	0.5	0.375
CN317	(TC)23	TTATGAGCATGCTGAGCTGG	AAGCAGCAACCTTTCTTTGC	59.637	223	7	0.81405	0.787899
CN318	(GCG)8	CGGTGAGGTTTTCTTCTTGC	TTGCTGCTCACATACTTGGC	60.019	223	2	0.0907029	0.0865894
CN319	(GCA)6	CGCATGCTTTTTCCTCTAGC	CAACAATCGCTCTCCTCTCC	59.95	223	1	0	0
CN320	(GAA)9	AATAAGATGCTCCATCCCCC	ATAACCCCTACTCCGTTGCC	60.208	223	1	0	0
CN321	(CTAT)7	AAGAAGCAGGAGAGTGCTGG	CTCACATGATGATGGCAAGG	60.072	223	7	0.797521	0.770209
CN322	(CGGCTT)4	TTCCCAGATTTGTGTTGTGC	GTTTTCCTTCCTCTCCGACC	60.052	223	5	0.681818	0.629901
CN323	(TC)9gcctcgcccaaatcagaagtgagtgag(TGAT)5	TCGGTTTGTTCGTTTCTTCC	AATCACAAATGCCGGATAGG	59.784	224	4	0.607438	0.547734
CN324	(CT)10	GCTCAAGAAATATCTCGCCG	CATCCCATTTATAGCGGTGG	60.167	224	2	0.375	0.304688
CN325	(GCG)6	GCCTCCCTCTTGTTTATCCC	GCCTCTCCTCTCACCTTTCC	60.336	224	3	0.533058	0.431554
CN326	(GCC)6	AGCCAAAGCCCTAGAACTCC	GATGTTGTGCATCCAAATCG	59.931	224	1	0	0
CN327	(CTCC)5	AAGCTTTAATGAGCAAGGCG	CAATGGGATTTGAGGTGAGG	60.309	224	3	0.544218	0.439323
CN328	(CAG)6	AGTAGGAGGCTTCCTCGTCG	CTCACATTCAGATGATGCGG	60.225	225	4	0.590909	0.546983
CN329	(AGATAA)3	AATCTGAATCGGATGCAAGC	TTTTTGACCCAAAACCAAGG	59.811	225	2	0.375	0.304688
CN330	(AGTGCT)3	CCTCCTGCTTCACAAACTCC	ACGATATGCTCCCATGTTCC	59.78	225	1	0	0
CN331	(CTCCGC)3	GAGCTCAGACTCGCTTGTCC	TGGACTGCATCAGTTTCTGG	59.831	225	3	0.541322	0.463177
CN332	(CTCCTG)3	CTACCAAATGGGCTAGAGCG	TGGTAGGCACAAGGATAGGG	59.948	225	4	0.630385	0.573588
CN333	(GA)9	TGTCAACAAGTACCTGAAAATCC	TTTTGCTCTTTGCTTTCACG	59.226	226	3	0.541322	0.43613
CN334	(CT)10	AGGCTCCACTGTTGATCAGG	GCATCAGCCTCTGTCTACCC	59.834	226	3	0.541322	0.43613
CN335	(GGAA)5	TGGAAGTAACTGCTGAGGGC	TCATAGCAGTTCGCTGTTCG	60.157	226	4	0.640496	0.571776
CN336	(ACCCTG)3	TCAAGAAGGGGAAGAGGAGC	ATACATCACCGGAGCAGAGC	60.249	226	3	0.309917	0.282178
CN337	(CATCTA)3	ACAAGGTGGCTGAGAGATGC	CCCAACCAACAGGACATAGG	60.224	226	3	0.599174	0.518843
CN338	(CCTCTC)3	CGTGAGCCCCATATATCAGC	AACCGAAGACGACAAACACC	60.012	226	3	0.476562	0.42746
CN339	(AGT)15	TTCTTCCATGCTACCAACCC	ATGAGACAGTCTTGCACCCC	60.12	227	5	0.694215	0.640069
CN340	(AGAACA)3	AACTGTACGGGGGATAAGGC	TTCCGAAATCTGTACCCAGG	59.926	227	1	0	0
CN341	(CCGTCG)3	GGTTTTCAATGGATGGATGC	GAAATTTTAGTCCCCCTGCC	59.777	227	4	0.679688	0.617889
CN342	(CTG)6	TACATGACCACCATTGCTGC	TGTCAGTGAGATCGAGGTGG	59.82	228	4	0.640496	0.571776
CN343	(CATG)5	CGGATTGGACATTTTGAACC	AACAAGAACAATGGCTTGGC	60.118	228	1	0	0
CN344	(CTCCGA)3	CTCACCTCCAGCGAAGGC	ACTATCCGGCTATCCCATCC	60.138	228	1	0	0
CN345	(GA)10	CCCCCTTGTTAATCTCTCCC	ATACAGGGAACAATGAGGCG	59.955	229	2	0.117188	0.110321
CN346	(ACGT)5	GGCGCTCAAGTTTGTCTACC	TCCAATCCCTACCTTTTCCC	60.124	229	1	0	0
CN347	(GAGCT)4	GCCATCACTTAGCTCCAAGC	CTCCTTCATCTTCCTCGTCG	59.943	229	5	0.625	0.585999
CN348	(CGCCCG)3	ACCTTCCTCCTCAACTTCCC	CTTGAAAATTCGGGTTAGCG	59.715	229	1	0	0
CN349	(CGGCGA)4	CCTTTCCTTCCTTCCTCACC	ACTCACAAGCATGAGCAACG	60.056	229	6	0.735537	0.697442
CN350	(CTTCCT)3	CCCAGAGCAGTTTTAGCAGG	TCATGACAAGATCCACTGGC	59.637	229	2	0.429688	0.337372
CN351	(GCC)7	AAAGCTGGACTCTCTGCTGC	GGAGCTGGATTGTTAGCTCG	59.978	230	3	0.417355	0.360315
CN352	(GCC)8	GTTCTTCTTCCGCAAGGC	TCTTCACAGGTTACAGGCCC	60.111	230	4	0.632812	0.570282
CN353	(TGTGC)4	AGCTGAACTCGTCTTCCTCG	CTCCTTAAACTCGCCACTGC	60.015	230	3	0.533058	0.431554
CN354	(CCTTCC)3	CGGTCAGAAACAAAAGAGGG	TGAAACTGACCCGGTAAAGG	59.964	230	3	0.539683	0.436814
CN355	(CTCCCT)4	CTCCCTCTCCCTCTTTGTCC	GCACCAATCATAGTGGGAGG	60.34	230	7	0.712018	0.682
CN356	(CTTCAG)3	CTCAACAGTTCAAATGGATTGC	TTTGTGCTGTGAAAGCAAGG	60.027	230	1	0	0
CN357	(TG)10	TTGTTTTGAGGGAAGGTTGG	AGCACCTAAAGGCACATTGG	60.132	231	5	0.756198	0.714731
CN358	(CA)12	CAGAGCTGGTAGGTGAAGGC	CGCGTACAAGGTATGTGTGC	60.203	231	2	0.117188	0.110321
CN359	(GTG)6	GTTGGAGTAGCAGCAGGAGG	CCGCGGATGACTGTAGTACC	60.538	231	2	0.495868	0.372925
CN360	(ATC)7	CTTTACCGATCTTTGCGAGG	ACTCATGCAAAAGGCTCTGG	60.397	231	2	0.5	0.375
CN361	(TAAT)7	AAGAAGGAGAGCTTCCAGGG	TGCCTCTGAGCATGTACTCG	60.16	231	3	0.458678	0.387294
CN362	(CCTCTT)3	CCTTAGAAGTGCTGTTGCCC	TACAGGAAAAACCAGACGCC	60.11	231	8	0.772727	0.749923
CN363	(GAAGAT)3	TCAGTTCATCAGCGTTTTGG	AACTTTGGATTTGACACGCC	59.978	231	3	0.398438	0.354218
CN364	(GTCTTT)3gtccttctcctcgccgtcagcattgccaccctcc(TTCTCT)3	ATGCGAACCTTGGATAATGC	GGTGGTGATGAGAAGAAGGC	59.661	232	3	0.57438	0.483804
CN365	(CT)11	CCAACGATCCAAAATCATCC	AAATCGAGTAGCAGCGAACG	60.543	232	4	0.435556	0.406519
CN366	(CTT)6	GATACCCCTCCTTCTCCAGG	CGTCTCCCTCTACCTCCTCC	60.208	232	1	0	0
CN367	(CTG)6	AAAACAGCAAGCTCTCTCGG	ATCAGAGCATCGGAGATTCG	60.326	232	2	0.495868	0.372925
CN368	(CGTCT)4	GATTCTTGGAGACGGAGACG	TTGCAGTTGCAGATCAAACC	59.847	232	2	0.495868	0.372925
CN369	(ACTCTG)3	CCTCAGGACTTTATCCGTGC	GGATCGGAAACACAACAAGG	60.353	232	3	0.533058	0.431554
CN370	(AGAAAG)3	GTGGAAGGTGAGGTCAGAGG	CATCACTTGAGCTTGCTTGG	59.591	232	3	0.458678	0.387294
CN371	(GACGGC)3	TATTCGCTCCGTTTTCATCC	CACAATTACAGTTGCACCGC	60.18	232	1	0	0
CN372	(CT)10	ACCAACAATATCAGGCTGGC	GTCGAGGAAGGTGACTGAGC	59.993	233	1	0	0
CN373	(AC)9	ATTACTAACGACGAAGGCCG	AAACGACTTCGATTTGTGACG	60.161	233	2	0.375	0.304688
CN374	(GCG)6	CTGACACAGGGTGTTGTTGG	ACATTAGAAGGCAAGCACCG	60.27	233	6	0.677686	0.638498
CN375	(GAC)6	ACCATTTCCAGATGACTCGG	CACCTCCTTCGTCTCAGAGC	60.135	233	3	0.570312	0.495575
CN376	(CGGCAG)3	GAATCTGGTTGTGATTGGGG	ATGCCGCTATCAATCTGAGG	60.199	233	3	0.557851	0.490156
CN377	(CGT)7	TGGGTTAATCTCCCTGATCG	CAGAAGCTCTGGTAGGTCCG	60.005	234	1	0	0
CN378	(TCT)9	ACGGACAAGGCATCTACTCG	CTCAAGGTGCACATCAATGG	60.112	235	4	0.628099	0.580561
CN379	(ATCC)5	ATCGCTTCTCTCCCTTAGCC	AAATGCTCAGTGGGTTTTGG	59.971	235	1	0	0
CN380	(CCAACC)3	CCCTCTAGACTTGCCCTTCC	CCCTCACCTCTCTCTCAACG	59.978	235	3	0.458678	0.387294
CN381	(CAG)7	TCCATAGCCTCATCACTCCC	AACAAACCAAACTGAACCGC	60.015	236	4	0.545455	0.504064
CN382	(CCG)6	TCTGAAAGTTGTGCTGCTGG	ACGACGAGAGGATCAGATGG	60.223	236	4	0.640496	0.580382
CN383	(GCTCG)4	GATTCATGGATATGCAGGGC	AAGCAAATGCCCAATAATGC	59.935	236	3	0.226562	0.214569
CN384	(CTCACA)5	ACAGTGCCGGACTTATTTGG	TAGTAGTCAACGGCGGAACC	60.132	236	3	0.460938	0.397675
CN385	(TGA)6	GTGTTCTTCGTTTCTTGGGC	GAAGCATTCTTGGATTTCCG	59.645	237	2	0.297521	0.253261
CN386	(CGA)7	TCAGATCAGGAGAACCCACC	ACTGGAGACTGGAGAGCAGC	59.738	237	4	0.640496	0.580382
CN387	(CTC)7	TGTCGTTGTCACCTTCTTCG	GCGAGAATAAGCTGTTTGGC	59.988	237	1	0	0
CN388	(CTG)10	GAAGCGAGAAACAAGCAAGC	GCTGCAAAAGCTATCAAGGC	60.124	237	5	0.673554	0.631745
CN389	(CGC)7	TTTCTCATTCCACTCCGAGC	TGAGCGTGTAGCGTACTTGG	60.073	238	5	0.615702	0.562146
CN390	(TGA)7	CACACAAGATTGGATGTCGG	GGCAATGTATTTACTAGCCTCCC	60.227	238	8	0.780992	0.749923
CN391	(AGA)9	AGTGGGCTACATGAGATGGC	GCATCCTGTTCTTGACCACC	60.52	238	2	0.152778	0.141107
CN392	(CTTT)6	AGGAGGGGAGAAACAGAAGC	TCATCACTCGTTCAGGTTCG	59.831	238	3	0.541322	0.43613
CN393	(CAACTC)3	TTGTGGATATTGGAGGGAGC	AAAAAGGGGAGAGAAGCAGG	59.821	238	3	0.544218	0.439323
CN394	(CCGTGC)3	CGGACACCTTAACTTCGAGC	CACATTTTGCATTACTGGCG	60.133	238	2	0.498866	0.374432
CN395	(CGTCGC)4	ATTCAGAACCGATCGAGACG	ATGGCGCTGTAGAATCAACC	60.103	238	4	0.516529	0.452317
CN396	(GA)13	GCATTTGAGCTTCTTGAGGG	CACAACCAGCAAAACACACC	60.049	239	2	0.498866	0.374432
CN397	(GGA)6	TCTTTCCGTTGTTTCTTCGC	CTGTTCCCCGTCACGTCC	62.599	239	3	0.320312	0.294403
CN398	(AAG)13	CATCGAAATTAATCGTCCTGG	AGAGAATGCCATGAACAGCC	60.226	239	3	0.594104	0.517398
CN399	(TCGA)7	TCAAACTCTGGCATCTGTCG	GGCGAAGATAGCTTACGTGC	60.01	239	3	0.320312	0.294403
CN400	(TCGCG)4	CTGGTAGATTCCCTCCTCCC	CAATCCAATCCAATCCAACC	59.991	239	5	0.640496	0.601282
CN401	(AGATT)4	TTTCGGGCATTTTCTGTAGG	TATGGGAGAGGAAACAACCG	59.926	239	4	0.607438	0.533391
CN402	(AGAGGC)3	GCAGTAAAAGAAGCGATCCG	CGGTTTTGTTTATTCTCGCC	59.586	239	2	0.304688	0.25827
CN403	(AGGGAG)3	CTAGTGCGGAGGCAGATAGG	CTATGAGAGGAGGACGGTGG	59.673	239	6	0.68595	0.632897
CN404	(CGAAAA)3	GAGGAGAGTGGTACGGATGC	TATACGATGGAGTGGGAGCC	59.917	239	3	0.599174	0.532366
CN405	(TCC)6	ATGTATTCTTGGGGAATGCG	TTGCTACACGCACGTAGAGG	60.073	240	1	0	0
CN406	(GAA)23	AACTTCCAACCCACACAAGG	CCTCTCTGCCATTTCTCAGG	59.943	240	9	0.809917	0.791903
CN407	(TCGA)5	ACGACGATTGAACTGACACG	AAAAGTGGGTGTCAGCAACC	60.012	240	2	0.0867769	0.0830117
CN408	(CGTA)5	TCGACAAAAACCTGTCCTCC	ATCTTTGGTGATCTCACGGC	60.081	240	4	0.640496	0.580382
CN409	(CATTCA)3	GGGTGATCATGGGTGATAGG	TGTGGGTTCAGTGTGAATCG	60.57	240	8	0.820312	0.799347
CN410	(CTAGCT)3	TGCCATATTGCTCATGTTGC	TCCCTCCATGTTAAGGATGC	59.894	240	2	0.495868	0.372925
CN411	(GAG)6	GGTGAAGAGGTCGACAAAGC	TCACCGTCATCACAGAGACC	59.665	241	2	0.0867769	0.0830117
CN412	(CAG)6	ATCACCTGCAGGAGCAGC	ACTCGGAGAACTCGATGAGG	59.405	241	5	0.652893	0.600796
CN413	(TAG)6	AGGAGAGAGAGCACACCAGC	GATAAGCTTGGAGCAGGACG	59.978	241	3	0.615702	0.54186
CN414	(GTC)6	GAGTCTTATTGGGTCGTGCC	ACTTCGTCCGTGTTACCAGC	60.179	241	1	0	0
CN415	(AGAA)5	GACAAAAGCACACACGAAGC	AAGGTGAAAGGGGAAGAAGC	59.691	241	3	0.395	0.346988
CN416	(ATGGCA)3	AGAGGGTGGTGATCATGAGG	CGTGATCACTGGATGTTTCG	60.112	241	2	0.396694	0.318011
CN417	(CAACAG)3	TTCCCTAGGCATATGAACGG	TTTGGCTTGGATTTACTGGG	59.931	241	2	0.495868	0.372925
CN418	(CGGAAA)4	TCTGCTGTGGTAAAAACCCC	TTTCGAAAAGTTTCCAACCG	60.081	241	2	0.152778	0.141107
CN419	(CTACTC)3	GGGTATTGCCATCCCTAGC	AGAGAAGGGAAAGGAAAGCG	59.955	241	3	0.243802	0.228357
CN420	(CTT)6	TACCCTTTTTGGGTCACTCG	GCCAGGACTGATTTCGTAGC	59.843	242	4	0.578512	0.491377
CN421	(CTGC)5	TCGAACCGATCGATATAGCC	GATCCAGCGAAGAAATCACC	59.635	242	3	0.555	0.490988
CN422	(A)19	GGTGCTCTACTCGTTCAGCC	AGCAAGACACAAAATGCACG	59.911	243	5	0.681818	0.644654
CN423	(GGT)6	AAAAACAAAACCCTAGCGGC	TACCCAGCCATCTTTATGCC	59.923	243	3	0.549383	0.447855
CN424	(AAG)17	TAGTGCAAAATCGCAGATCG	GAGAAGAAAACTCCGACCCC	60.052	243	3	0.561983	0.476197
CN425	(AG)9	CTGTAGCTTCTGCTGCCTCC	CACTGCAGACACTAGCCAGC	59.801	244	1	0	0
CN426	(AGGAG)6	CTGCAGCTGTATTGCAGAGG	GAATGGATGGAGATGATGCC	60.252	244	4	0.318182	0.301508
CN427	(CAAATC)3	AGTGATCATTTTCGGTTGGC	CAGTGAAGGCCAAACACTCC	60.69	244	1	0	0
CN428	(CATCGC)3	CATCAATCACCCACATAGCG	GTGCTAAGCTAGCTGCTGCC	60.458	244	2	0.498615	0.374307
CN429	(CCTCTC)3	CAACTAATCTGAGCCGAGCC	TGAGAGGGAGAGAGAGCAGC	59.969	244	2	0.46281	0.355713
CN430	(CT)10(CA)9	GAATCCCTCTTGATCCTCCC	TATCATCTCCAGACCCTGGC	60.034	245	3	0.460938	0.397675
CN431	(TTA)6	TTGGGATCCTGAACTGAAGG	TTGTTTGGTCATGCTCTTGC	59.847	245	2	0.375	0.304688
CN432	(ACGCCA)3	CGAGATTTGGATGCTTCTCC	AAAATGAATGACGACCTCGC	60.081	245	3	0.595041	0.526194
CN433	(CGGCGA)3	TCTCGAACACCCTGAACTCC	CGGAGAAGAAAAGTTCGACG	59.986	245	1	0	0
CN434	(CTAGCT)3	GGAAGCTCATGACAACCTCC	CTCTTGTTGAGCTTGCCTCC	60.134	245	1	0	0
CN435	(A)19	TCAGACGTGAACAGTCCTGC	AACGGAAACCAATTGTCAGC	59.978	246	3	0.357143	0.325437
CN436	(GCT)6	CTGAGCTCGTGTTAGCCTCC	AGCCTAACCGTGAGTGATGC	60.285	246	1	0	0
CN437	(CAG)6	CTGCAATATTGGTCAATGCG	GAGAGACAAGCGGAAAATCG	59.955	246	4	0.495868	0.458524
CN438	(TGC)6	ATGCAATCCAACCGTAGAGC	TGCCATTAGCGGATCATACC	60.827	247	1	0	0
CN439	(ATCG)5	TGTAGTGCTCCGTGTATGGC	GTTGCATCATGTATACGCCG	59.983	247	2	0.304688	0.25827
CN440	(GATG)5	GTGTTTGTGGGTGTCTGTGG	GAGGTTGCAAGGCTAAGTGC	60.022	247	1	0	0
CN441	(AATATA)3	AACTTATTCCACAGGCACGG	GATCAAAGGCTGACTTTCGC	59.962	247	4	0.512346	0.473003
CN442	(CCGTCG)3	TTCGTCTTACCAATGGAGCC	TTTCAGTTATTCCCATCGCC	59.901	247	1	0	0
CN443	(CCTTTT)3	AATGGCTCTAGTGTGGCTGG	TGAATGCACAGGAGAACTGC	59.992	247	1	0	0
CN444	(GGC)6	TCCATACCAATCCTCATCCC	GGACTGGGTCAAGAAGAACG	59.697	248	3	0.614958	0.536092
CN445	(TTAT)5	TGTCAAGACCAAATTGAGCC	GGGGGTTGAAAGAGAAAAGG	59.912	248	1	0	0
CN446	(CTCTC)4	GTTTCCCTGACAGCTTAGCG	ACAGAGAGATGCACCACACG	59.897	248	2	0.396694	0.318011
CN447	(AG)12	GAGGGGAAGAAGTGGAAACC	TGATCAGCACTCAGCACTCC	60.146	249	3	0.599174	0.532366
CN448	(TC)13	TGATCAGCACTCAGCACTCC	GAGGGGAAGAAGTGGAAACC	59.912	249	6	0.772727	0.737014
CN449	(AG)9	TTGCAGCATGCATAAAAAGG	CCTTGTGATCCCAAACTTCC	59.381	249	1	0	0
CN450	(AG)9	CTAGCCAATTAGCGGAGTCG	GTTCTGATCTGCCTTCTCCC	58.818	249	1	0	0
CN451	(CA)10	TGGATCAATGCAGTGAAAGC	TGATGCATTATTGGTTTCCG	59.377	250	2	0.396694	0.318011
CN452	(CT)9	CTTTTCAGCCTTTTTGAGCG	CAGTCTGCAGCAATAGCAGG	59.764	250	2	0.391111	0.314627
CN453	(GTC)6gctcccttgctcctcgccatgcttcgggtgaagctggcgagga(GTG)6	CTGATCACCATGTACCACGC	GAACCTGTCACCGATCATGG	61.356	251	3	0.5	0.449074
CN454	(GTA)13	TTGTCCAGTTCAGATGCTCG	ACACTAAAGTTGATGCCCCG	59.993	251	2	0.429688	0.337372
CN455	(AAAAGC)3	TACACTTCACACTCGCCTGC	AACGAAAACATTTTCAGCGG	60.11	251	1	0	0
CN456	(AAAAGT)3	AAACAATGCGCTAATCCACC	TTTCATGGTAAAAGTCCGCC	59.938	253	2	0.104938	0.0994323
CN457	(AAAGAG)3	ACCGTATCGACGGAGTATCG	AGGACCACGAGGTGTTATCG	59.989	253	2	0.495868	0.372925
CN458	(AAGAAA)3	GAATGTATGCATGGTGGTGG	TCTCTTTCTGGCTTGCTTGC	60.796	254	2	0.336735	0.28004
CN459	(TC)16	ACAGGCAAGCTAAAAGTGCC	TGCTCCATTAGCAGATCACG	59.972	255	2	0.495868	0.372925
CN460	(TG)16	CAATTATGTGATTCCACAAGGC	TATCTTGTTGCTTTGGCACG	59.872	256	5	0.681818	0.629901
CN461	(AG)15	CAAGCGTGTATCAGAGAGCG	TGTCACAACTCCACACATGC	59.101	259	3	0.585938	0.519745
CN462	(CT)11	AGGAGATGATGGTGAAACGG	GCATTGGTACAACATTTGCG	59.999	264	3	0.475207	0.418645
CN463	(TAGGC)4	TGGATTGGAGAATTTGGAGC	TGCCAACCACTACATTGACC	59.42	264	1	0	0
CN464	(AAAAAG)3	ACCTTGCATATGGTTCCAGC	TCAGGCTTGTGTTCTTTCCC	60.232	264	1	0	0
CN465	(AATCTT)3	TGCTCCTTCCATATTCACCC	GAATCGGATACATGCGACG	60.049	264	1	0	0
CN466	(GTG)7	ACTGCTGTATCCCGCATAGG	ACACTGGTACCCCATCTTCG	59.844	266	3	0.321995	0.292183
CN467	(ATCTAA)3(TCTAAA)4	TGCAAAAGAAAAGCTAATCGG	GGAAAAGAAACGTGCAAAGC	59.867	267	1	0	0
CN468	(TC)18	GTACACACTGCACGGTCAGG	TAGTGGCCTCATGAAAAGGG	60.066	267	1	0	0
CN469	(TC)12	GCATCATGTGCTGTTTTTGG	AGATCCAAACCAGATCGACG	60.073	268	6	0.702948	0.667952
CN470	(GAA)6	AATTCGAAGTGCCACAAACC	GATGTCGTCCACCACTTCG	60.105	268	1	0	0
CN471	(TC)20	GAAACAACAATGCGTCATGC	TCCTGCCAAAACAAGTCTCC	60.232	269	5	0.681818	0.626212
CN472	(TG)18	TGAATCATGAGGAATTTTCGC	AAAAAGAATATTGCGCCACG	60.095	269	2	0.375	0.304688
CN473	(GTT)6	TCAAGGAGGGTTGGTTATCG	ACAACCTCCTCATGAAACGC	60.119	270	2	0.408163	0.324865
CN474	(TGGTGA)3t(GGTGGA)3	GCTGAAGGTGAAGACCAAGC	AGCCTCCCTCTAGCACTTCC	59.979	271	2	0.495868	0.372925
CN475	(CA)15	AAGATTGGGTCAAATTCCCC	ACCTTCGATTCATGAGTGCC	60.081	271	2	0.375	0.304688
CN476	(GA)11	AAAAATTGTCTGCCGTCTGG	AACCCTAGAATTCCCATCCG	60.145	271	1	0	0
CN477	(AAAAAG)3	CCAACATGTGACCTTGAACG	GGCGATAGCTTTATCTCCCC	60.026	271	3	0.541322	0.43613
CN478	(AATAGG)3	ACCAATCTTGGGAAGACACG	TCCCTTCTCATATCGCATCC	59.998	271	1	0	0
CN479	(AAAATG)4	TCCGTGTAAGTGTGCTCTCG	AAGAGAGAAGTGCAGGCAGC	59.898	272	2	0.375	0.304688
CN480	(CTT)6	CTAGGGAGGAGGAGAGGACG	ATGAGCTGTTCTCACTGGGC	60.418	273	2	0.32	0.2688
CN481	(AG)14	GATATGTGTACGCACGCTGG	AAACCGAAACAAACAGTGGC	60.015	274	2	0.165289	0.151629
CN482	(ATAC)10	CGACAGAAAACAAACGAAAGC	TCGTGTGGCTTTATTCCACC	60.894	274	5	0.59	0.552525
CN483	(TC)13	CAAGCAAGCTAAAAGTGCCC	CGTCGAGCTAAATCCAGAGC	60.118	275	3	0.561983	0.476197
CN484	(AG)19	AGTTGGATGATTCGCTGACC	CAGAGCAGCATAAGGTGTGC	59.621	275	5	0.661157	0.612612
CN485	(CGG)6	TGTTGCAAAAACTGACGTGC	AGAGGAAGGAGGAGGACTGC	59.952	276	1	0	0
CN486	(AAAAGT)3	AAACCTTGGAAAAGGCTTGG	CTTGAGGAGTCCACTCTCCG	59.978	276	1	0	0
CN487	(GA)10	TCTGCAATTTCAGCACAAGG	CTTAGCTGCCAAGAATTGGG	59.839	277	4	0.484375	0.443176
CN488	(GA)11	AATAGCTGTCTGTCCCGACG	CAATGGCAGTGGTTATGACG	59.988	278	2	0.5	0.375
CN489	(CGG)6	ACCCTTCTTCCTTCCTCTCG	CCCCATACACTGACTCCTCC	59.38	278	1	0	0
CN490	(TG)9	GAATGGCTGTGTCAATGTGG	ATGACTCATCTCAATCGGGC	60.042	279	1	0	0
CN491	(GA)18	CAGATTTTGGGTTTGTTGGG	GCAGAAATGGATAGCTTCGC	59.951	280	2	0.35124	0.289555
CN492	(TG)10	AGATCGATTGAGATAGCGGC	CATATATACGCGCGTGAAGC	59.36	280	5	0.640496	0.601282
CN493	(AAAT)5	TGCATACTGCATATGTTGCG	GCACAAGATCTCAGGGTTCC	59.661	280	2	0.0867769	0.0830117
CN494	(CAGGT)4	ATGAACATTGCGGAAGAACC	TTTCTTGGTTCTTTGTGCCC	60.088	280	4	0.595041	0.554009
CN495	(TGCTG)4	GGTGCTTGGTTTAGGAATGG	CCAGAACCTGGAGATGTTTAGC	60.13	280	2	0.396694	0.318011
Mean						2.5	0.333	0.29
Note: Tm= optimized annealing temperature; Na= number of alleles per locus; He= gene diversity; PIC= polymorphism information content
